# Supplementary material for: Asymmetric faradaic assembly of Bi2O3and MnO2for a high-performance hybrid electrochemical energy storage device
Source: Royal Society of Chemistry journal article supplement (doi:10.1039/c9ra06331e), 2019-01-01
Supplement: c9ra06331e1.pdf [file c9ra06331e1.pdf]

## Supporting Information

### **Asymmetric Faradaic Assembly of Bi<sub>2</sub>O<sub>3</sub> and MnO<sub>2</sub> for High Performance Hybrid Electrochemical Energy Storage Device**

Saurabh Singh<sup>a</sup>, Rakesh K. Sahoo<sup>b</sup>, Nanasaheb M. Shinde<sup>c</sup>, Je Moon Yun<sup>b</sup>, Rajaram S. Mane<sup>c</sup>, Wonsub Chung<sup>a,\*</sup> and Kwang Ho Kim<sup>a,b,c,\*</sup>

<sup>a</sup> Department of Materials Science and Engineering, Pusan National University, Busan, Republic of Korea.

<sup>b</sup> Global Frontier R&D Centre for Hybrid Interface Materials, Pusan National University, Busan, Republic of Korea.

<sup>c</sup> National Core Research Centre for Hybrid Materials Solution, Pusan National University, Busan, Republic of Korea.

### S1: Specific Capacity calculation for electrode and device, and Energy Density and Power Density calculation for device

Specific Capacity from GCD curve is calculated using following relation in terms of C g<sup>-1</sup>;

$$Q = \frac{I t_d}{m_e} \quad (1)$$

Where,  $t_d$  is the discharge duration in GCD curve and  $m_e$  is the mass of active material loaded on the electrode or the total mass of the active material loaded on the device's positrode and negatrode. Further, for the case of non-linear GCD curves the discharged Energy Density from the device can be calculated by integrating the area under the discharged curve expressed as;

$$E_d = I \int_{t(V_{max})}^{t(V_{min})} V(t) dt \quad (2)$$

Where  $E_d$  is the discharge Energy Density,  $I$  is the discharge current and  $t(V_{min})$  and  $t(V_{max})$  is the limit of discharge time at highest and lowest voltage. Therefore, the corresponding Energy Density in terms of W h kg<sup>-1</sup> can be given as follows;

$$E_s = \frac{E_d}{3.6 m_t} \quad (3)$$

Where,  $E_s$  is the Energy Density and  $m_t$  is the total mass loaded on device's electrodes. Finally the Power Density in terms of W kg<sup>-1</sup> can be given as;

$$P_s = \frac{E_s}{t(V_{min}) - t(V_{max}) * 3600}$$

(4)

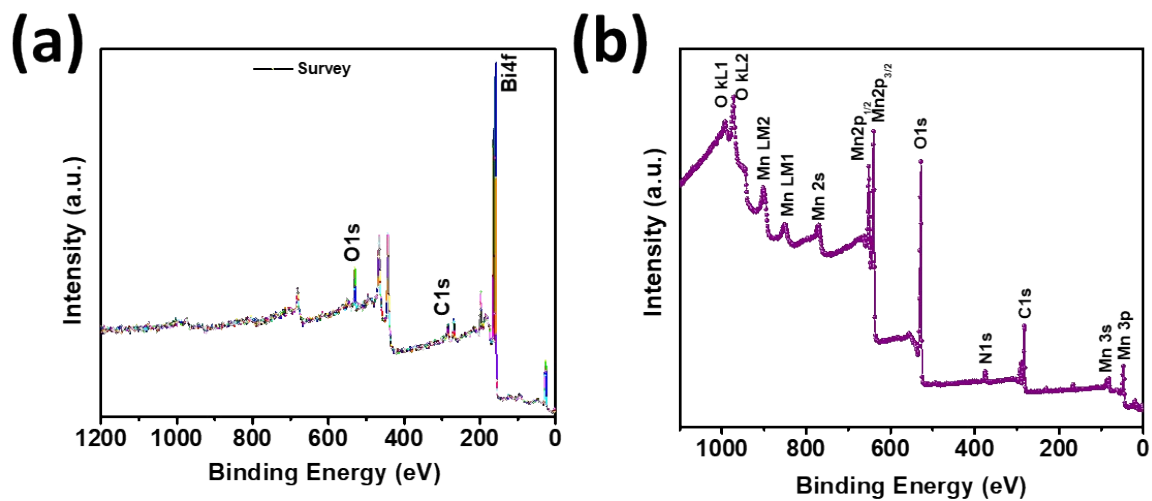

**Fig. S1.** Full Scan XPS spectra of (a)  $\text{Bi}_2\text{O}_3$  and (b)  $\text{MnO}_2$  nanostructures.

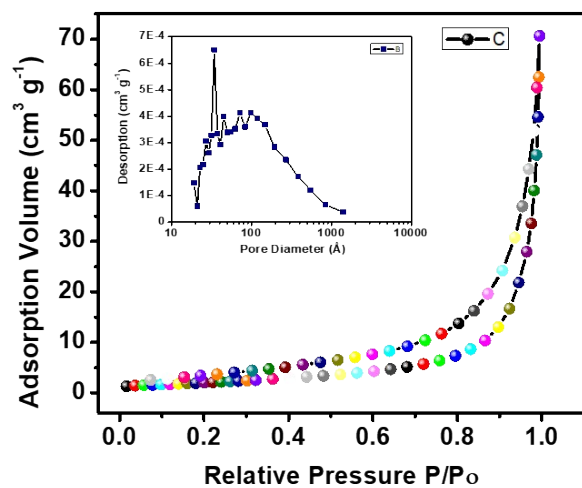

**Fig. S2.** BET isotherm curve of  $\text{Bi}_2\text{O}_3$  nanostructure with the inset of BJH pore size distribution.

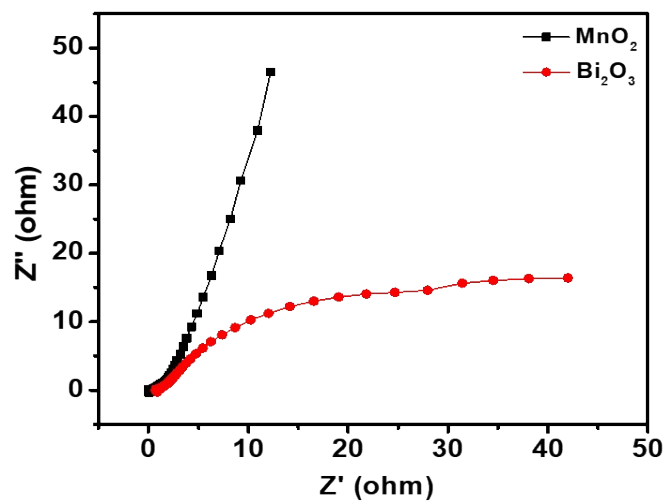

**Fig. S3.** Nyquist plot for  $\text{Bi}_2\text{O}_3$  and  $\text{MnO}_2$  electrode materials.

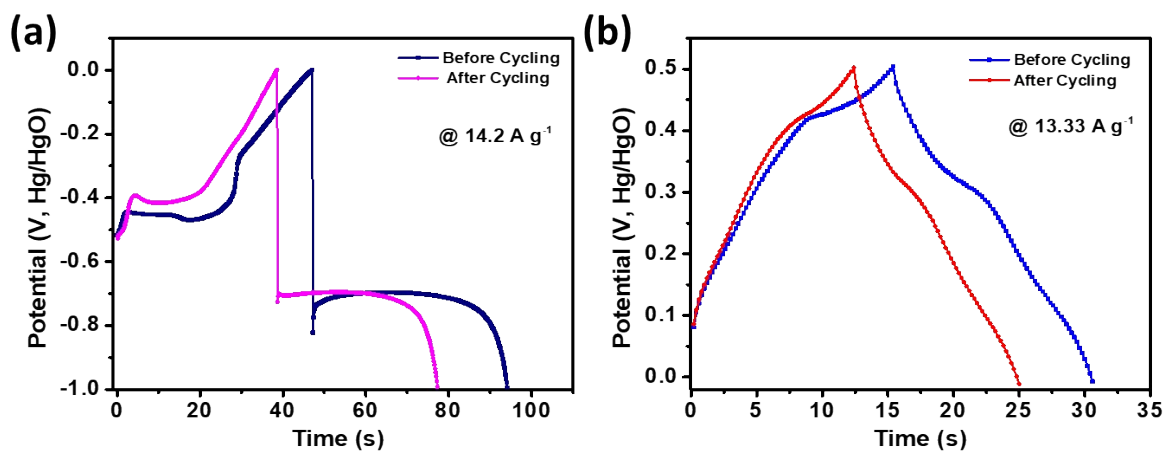

**Fig. S4.** GCD plots for (a)  $\text{Bi}_2\text{O}_3$  electrode and (b)  $\text{MnO}_2$  electrode materials before and after 4000-cycles.

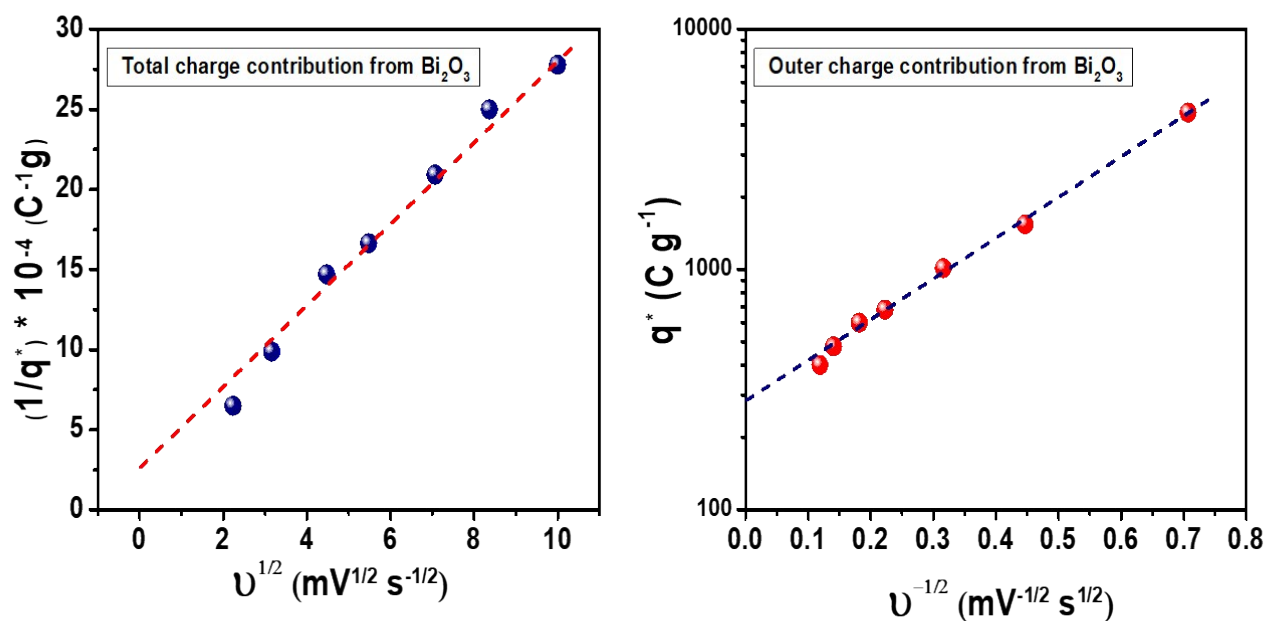

Fig. S5. Total and outer charge contribution plots for  $\text{Bi}_2\text{O}_3$  electrode.

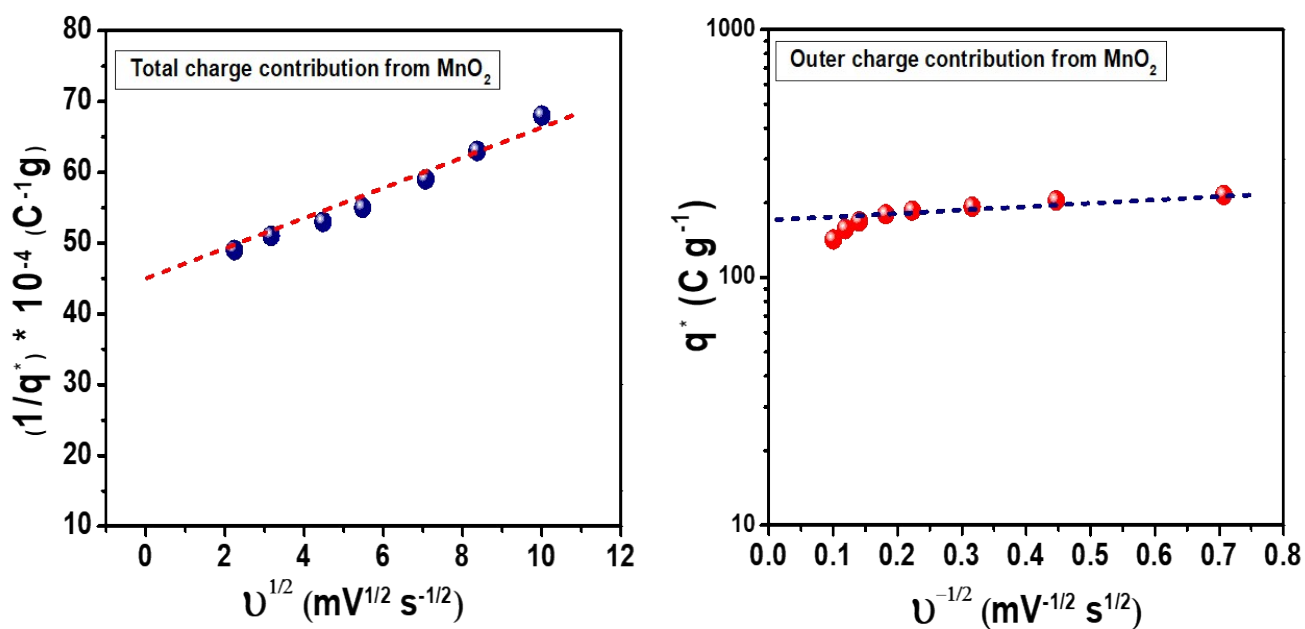

Fig. S6. Total and outer charge contribution plots for  $\text{MnO}_2$  electrode.

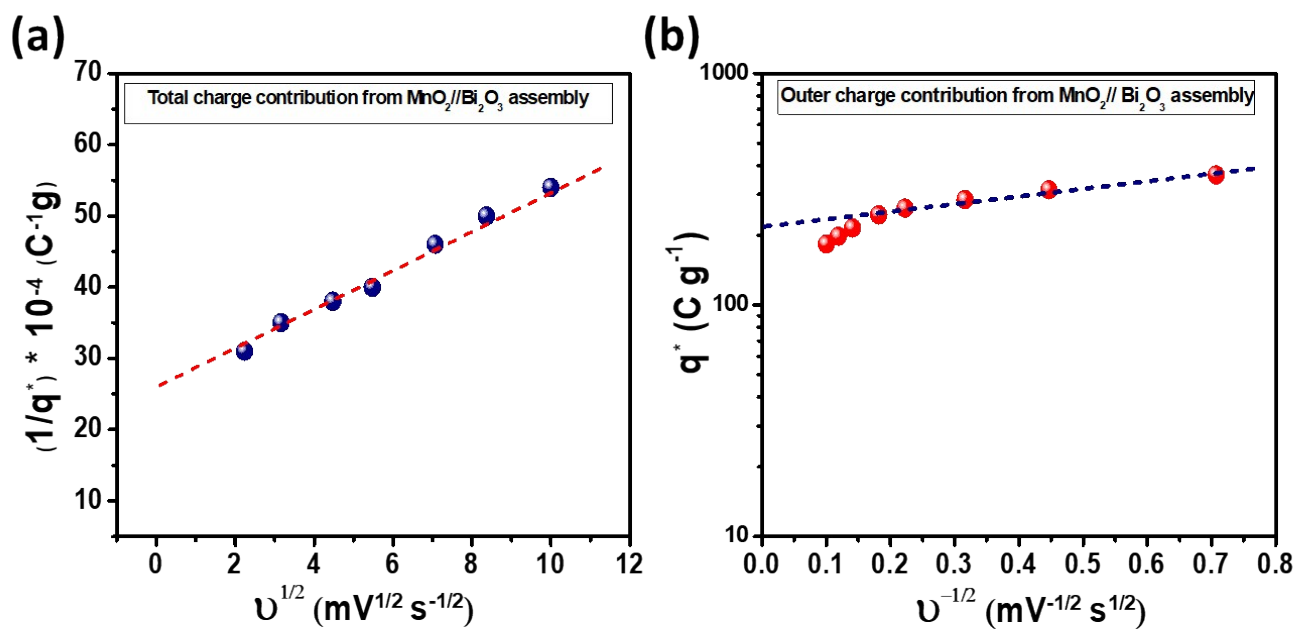

Fig. S7. Total (a) and outer (b) charge contribution plots for  $\text{MnO}_2 // \text{Bi}_2\text{O}_3$  HEESD.

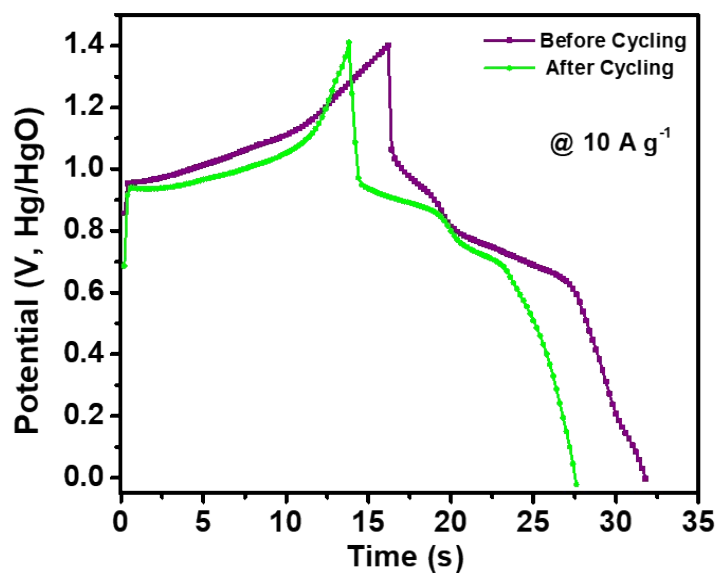

Fig. S8. GCD plot for  $\text{MnO}_2 // \text{Bi}_2\text{O}_3$  HEESD before and after 5000-cycle.
